# Supplementary material for: Technical note: Determining Arctic Ocean cold halocline and cold halostad layer depths based on vertical stability
Source: Copernicus journal article supplement (doi:10.5194/egusphere-2023-106), 2023-02-20
Supplement: Supplementary file 2 [file egusphere-2023-106-supplement.zip]

Archive with 4 entries (3 files):
- supplement-title-page.pdf
- Supplement/
- Supplement/supplement2.pdf
- Supplement/supplement1.pdf
