# Supplementary material for: Technical note: Determining Arctic Ocean cold halocline and cold halostad layer depths based on vertical stability
Source: Copernicus journal article supplement (doi:10.5194/egusphere-2023-106), 2023-02-20
Supplement: Supplementary file 2 [file egusphere-2023-106-supplement.zip › supplement-title-page.pdf]

*Supplement of*

**Technical note: Determining Arctic Ocean  
cold halocline and cold halostad layer depths  
based on vertical stability**

**Enrico P. Metzner and Marc Salzmann**

*Correspondence to:* Enrico Metzner (enrico.metzner@uni-leipzig.de)

- supplement-title-page.pdf
- supplement1.pdf
- supplement2.pdf
