# Supplementary material for: Technical note: Determining Arctic Ocean cold halocline and cold halostad layer depths based on vertical stability
Source: Copernicus journal article supplement (doi:10.5194/egusphere-2023-106), 2023-02-20
Supplement: Supplementary file 2 [file egusphere-2023-106-supplement.zip › Supplement/supplement1.pdf]

## Supplement 1

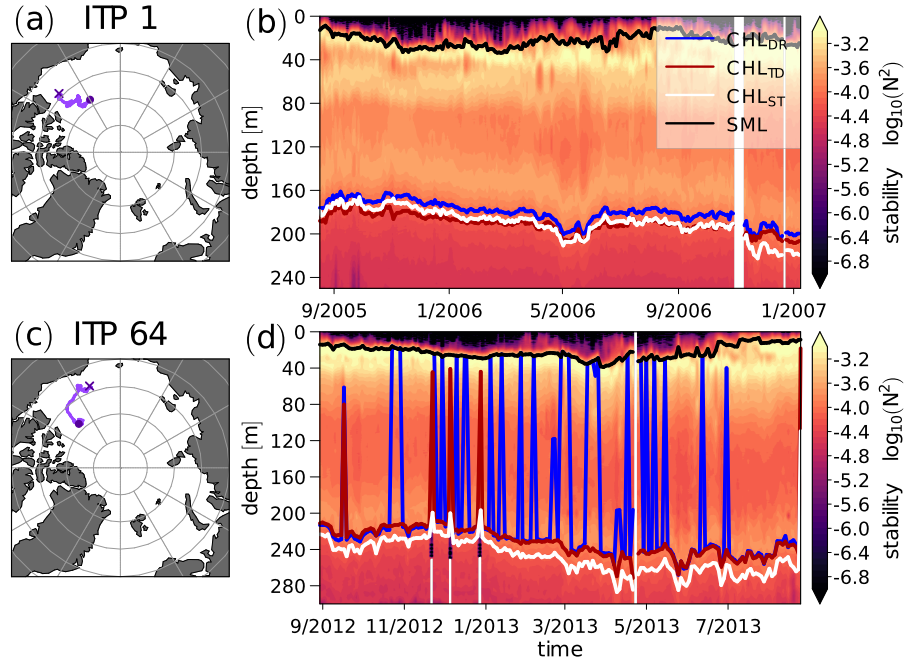

**Figure S1.** Same as Fig. 2 a and d for (top) ITP 1 and (base) ITP 64.

For ITP 1 and ITP 64 in the Amerasian Basin, the three different methods yield fairly similar results for the CHL base depth. However, ITP 64 shows spurious maxima for the DR and the TD method, with more spurious maxima for the DR method. The spurious maxima from the TD method do not reach the bottom of the SML for ITP 64.
